# Supplementary material for: A multi-population phenome-wide association study of genetically-predicted height in the Million Veteran Program
Source: PLOS journal article supplement (doi:10.1371/journal.pgen.1010193), 2022-06-02

**S2 Fig. Effect size comparison of associations of genetically-predicted height with clinical traits in MR-PheWAS without and with body mass index (BMI) as a covariate in non-Hispanic White (A) and non-Hispanic Black (B) individuals.**

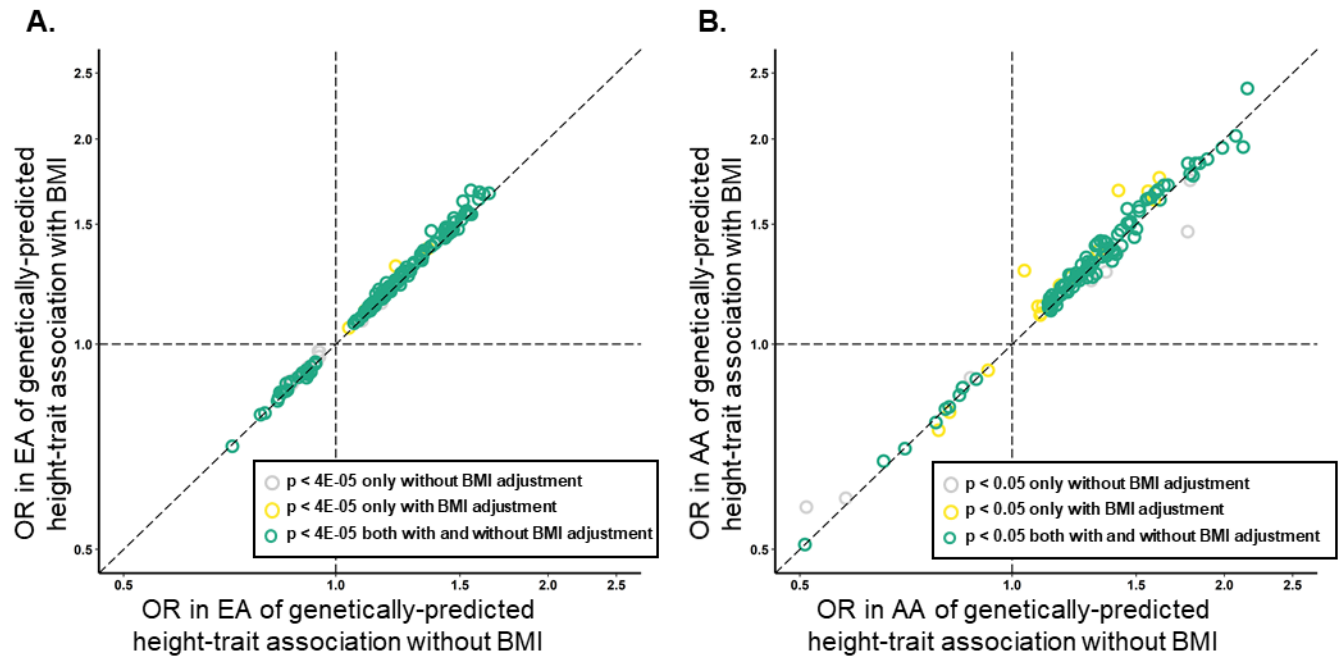

Supplement: S3 (10.1371/journal.pgen.1010193.s003) [file journal.pgen.1010193.s003]
