# Supplementary material for: A multi-population phenome-wide association study of genetically-predicted height in the Million Veteran Program
Source: PLoS Genet. 2022 Jun 2;18(6):e1010193. doi: 10.1371/journal.pgen.1010193 (PMC9162317; doi:10.1371/journal.pgen.1010193)
Supplement: S10 Table — (XLSX) [file pgen.1010193.s013.xlsx]

## Sheet: S10 Table
	S10 Table. Genomic annotation and regulatory function CADD scores for height-associated loci not identified in published European-ancestry GWAS.
	Locus	rsID	Chr	Position	Effect Allele (EA)	Other Allele	Nearest Gene	Genomic annotation	CADD score1
	1	rs698054	1	21041116	t	c	KIF17	intronic	0.376
	2	rs534396084	1	50901895	a	g	RP5-850O15.4	intergenic	2.819
	3	rs7519247	1	185911697	a	t	HMCN1	intronic	2.925
	3	rs1322376	1	186120139	t	g	HMCN1	intronic	9.699
	4	rs35069869	3	182963291	t	c	MCF2L2	intronic	na
	5	rs2768967	4	49049010	a	t	CWH43	intronic	na
	6	rs1840086	4	72135358	a	g	SLC4A4	intronic	na
	7	rs772919871	4	75043775	c	cat	MTHFD2L	intronic	na
	8	rs57902998	4	79656696	a	atatt	RP11-109G23.1	intergenic	na
	8	rs141234442	4	79679385	g	ga	RP11-109G23.1	intergenic	na
	8	rs557913441	4	79709850	g	gt	BMP2K	intronic	na
	8	rs28881880	4	79717084	t	g	BMP2K	intronic	na
	8	rs58171196	4	79793474	t	tttttttttta	BMP2K	intronic / 5' UTR	na
	8	rs76202297	4	80041494	a	c	BMP2K	none	na
	9	rs11737325	4	160015550	a	g	RAPGEF2	none	na
	10	rs6916161	6	28983846	a	g	OR2AD1P	none	na
	11	rs34107096	7	69490763	c	ct	AUTS2	intronic	na
	12	rs4269477	7	134389334	t	g	AC009276.4	none	na
	13	rs4748811	10	22838265	a	c	PIP4K2A	intronic	2.686
	14	rs572204234	10	74752542	g	gt	RPL17P50	none	na
	14	rs113905969	10	74766042	a	g	RPL17P50	intronic	0.57
	14	rs575240898	10	74925918	a	at	ECD	intronic	na
	14	rs113479340	10	75083092	g	ggggggc	TTC18	intronic	na
	14	rs576664643	10	75241561	c	ct	PPP3CB	intronic	na
	15	rs149380977	10	79572587	t	c	DLG5	intronic	5.435
	15	rs11002341	10	79701363	a	c	DLG5-AS1	none	4.246
	16	rs6488340	12	7635793	a	g	CD163	intronic	1.649
	16	rs7134596	12	7709417	t	g	GAPDHP31	none	9.531
	17	rs796760319	12	15065409	g	gt	ERP27	none	0.016
	18	rs28715541	12	50559224	g	ga	CERS5	intronic	0.121
	19	rs3812813	12	95927762	t	c	USP44	coding, non-synonymous	na
	20	rs553572137	12	107326209	t	ta	RPL30P12	none	na
	21	rs55830333	17	40259385	t	tta	DHX58	intronic	na
	21	rs2883233	17	40286827	c	g	RAB5C	intronic	0.996
	22	rs34172740	17	51522449	a	at	CTD-2535P7.2	none	na
	23	rs58587654	17	52292601	a	g	RP11-618P13.1	none	0.507
	24	rs7220190	17	53735407	a	g	TMEM100	none	5.812
	24	rs8079108	17	53744648	a	c	TMEM100	none	0.18
	25	rs551786086	17	58571005	c	ct	APPBP2	intronic	na
	25	rs1197095	17	58610478	t	c	RP11-15E18.1	intronic	5.799
	25	rs60200706	17	58642027	c	ct	RP11-15E18.4	intronic	na
	25	rs142308644	17	58691361	g	gggcccaagggctgaggagtgcg	PPM1D	intronic	0.87
	25	rs34279080	17	58751284	c	ct	BCAS3	none	na
	25	rs538508139	17	58906854	c	ca	BCAS3	intronic	na
	25	rs541536306	17	58994956	a	at	BCAS3	intronic	na
	26	rs35528570	17	62580234	a	g	SMURF2	intronic	0.015
	26	rs6504247	17	62662650	a	g	SMURF2	none	2.441
	26	rs35510520	17	62699807	a	at	SMURF2	none	na
	1 Shown are scaled CADD scores (PHRED-scaled scores) with values >10 corresponding to the 90th percentile of all variants examined when developing and assigning CADD scores [1].
	Reference
	1. Rentzsch P, Witten D, Cooper GM, Shendure J, Kircher M. Nucleic Acids Research (2018); 47:D886-D894.
